# Supplementary material for: T cell fate following Salmonella infection is determined by a STING-IRF1 signaling axis in mice
Source: PubMed Central journal article supplement (PMC6906324; doi:10.1038/s42003-019-0701-2), 2019-12-11
Supplement: 42003_2019_701_MOESM1_ESM.pdf [file 42003_2019_701_MOESM1_ESM.pdf]

## Supplementary data 1

Related to Fig.4a, b.

RNA-seq analysis of BMDCs from wild-type, *Tmem173*<sup>-/-</sup>, *Irf1*<sup>-/-</sup> and *Irf3/7*<sup>-/-</sup> mice after 18 hours of stimulation with c-di-GMP. Cuffdiff analysis, revealed a total of 4,588 genes that were found to be differentially expressed by more than twofold with a false discovery rate (FDR) cutoff of 0.05 between indicated groups.

## Supplementary data 2

Related to Fig.4b.

1869 differentially expressed genes that were significantly upregulated more than twofold could further be differentiated into clusters that were dependent on *Irf1* and/or *Irf3/7* distinguishing 6 signatures that were dependent on *Irf1* or *Irf3/7* alone or regulated by both *Irf1* and *Irf3/7* together.
