# Supplementary material for: T cell fate following Salmonella infection is determined by a STING-IRF1 signaling axis in mice
Source: PubMed Central journal article supplement (PMC6906324; doi:10.1038/s42003-019-0701-2), 2019-12-11
Supplement: 42003_2019_701_MOESM4_ESM.pdf [file 42003_2019_701_MOESM4_ESM.pdf]

## Supplementary Materials

### ***Supplementary Figure 1. Supporting evidence for IRF1, IRF3 and IFNAR dependent gene expression.***

(a) qRT-PCR analysis of *I112rb1* and *I112rb2* mRNA expression in BMDCs isolated from wild-type and *Irf1*<sup>-/-</sup> mice after 4- and 18-hours stimulation with 25µg/ml of c-di-GMP. n=4. \*  $p < 0.01$ .

(b-d) qRT-PCR analysis of the mRNA expression of indicated genes in BMDCs from wild-type, *Irf1*<sup>-/-</sup>, *Irf3*<sup>-/-</sup>; *Ifnar*<sup>-/-</sup> mice after 4 and 18 hours stimulation with 25µg/ml of c-di-GMP. Data shows mean ± SEM of two independent experiments. N=4 \*  $p < 0.01$ . NS, not significant. Two-way ANOVA with a Tukey's multiple comparisons test (a-d).

## Supplementary Figure 1

**a**

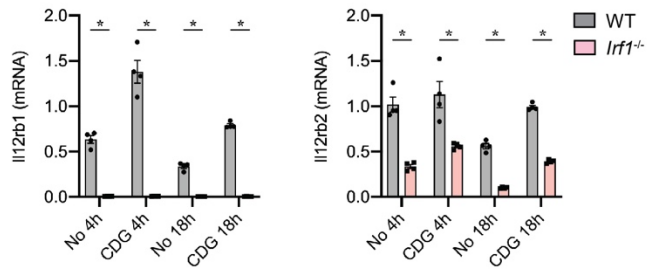

**b**

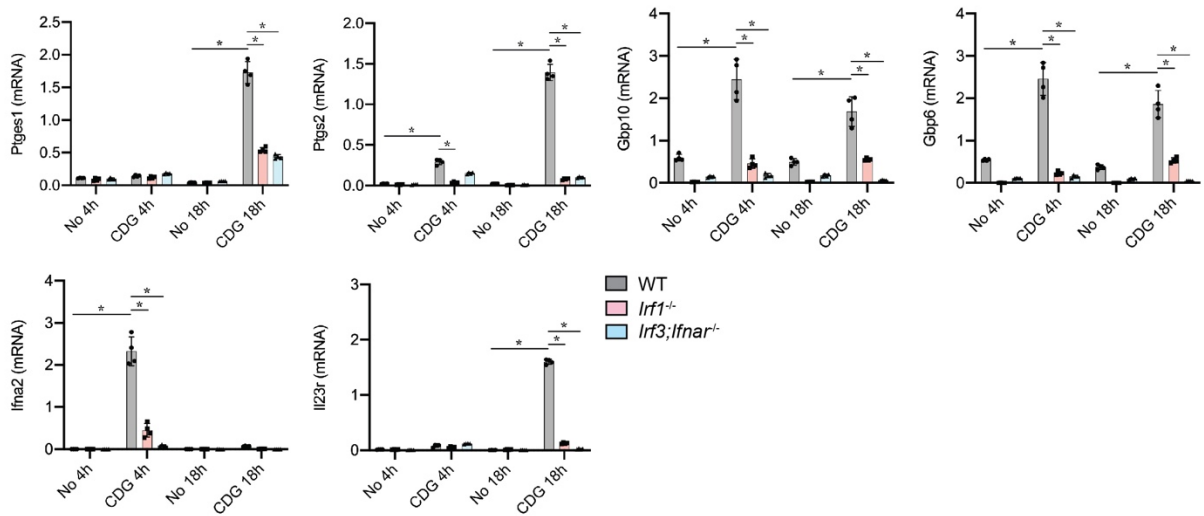

**c**

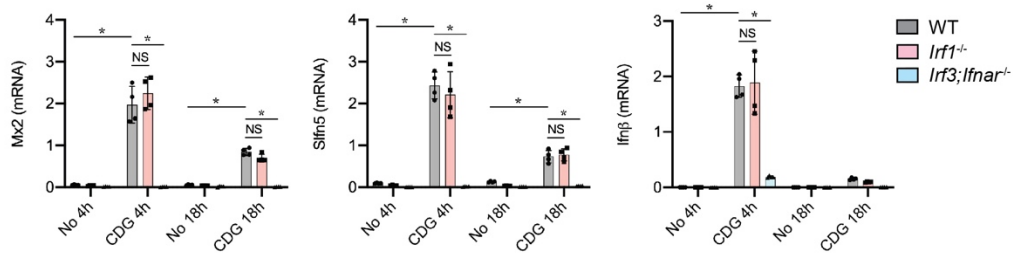

**d**

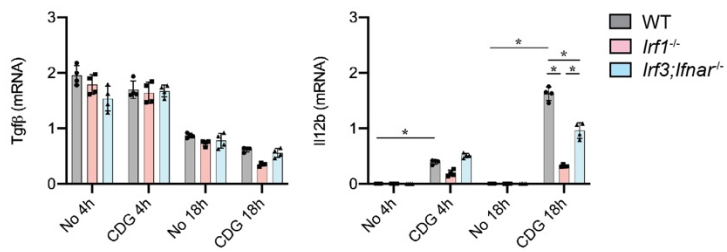

**Supplementary Figure 2. Inflammasome activation in BMDCs from wild-type, *Tmem173*<sup>-/-</sup> and *Irf1*<sup>-/-</sup> mice after LPS and ATP stimulation.**

(a) IL-1 $\alpha$  and IL-1 $\beta$  protein expression in supernatants of LPS-primed BMDCs isolated from wild-type, *Tmem173*<sup>-/-</sup> and *Irf1*<sup>-/-</sup> mice after stimulation with ATP. n=6. \*  $p < 0.001$ . Two-way ANOVA with a Tukey's multiple comparisons test.

**Supplementary Figure 2**

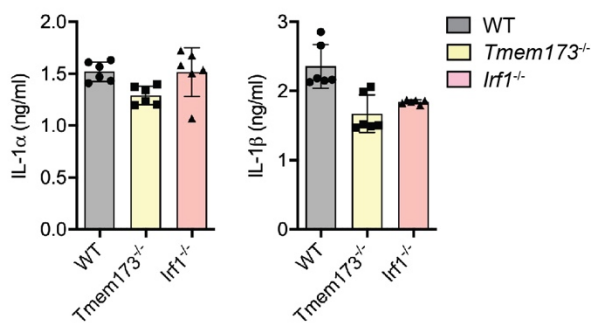

**Supplementary Figure 3. Cluster analysis of wild-type, IRF1 and IRF3/7 dependent gene expression signatures in response to c-di-GMP stimulation.**

Heat maps showing genes contained in the clusters aggregated in Fig.4c that dependent on the presence of IRF1 and IRF3/7 (cluster 3), that are upregulated in the absence of IRF3/7 (cluster 4) or dependent on the presence of IRF3/7 (cluster 5). Key regulators are indicated in red.

**Supplementary Figure 3**

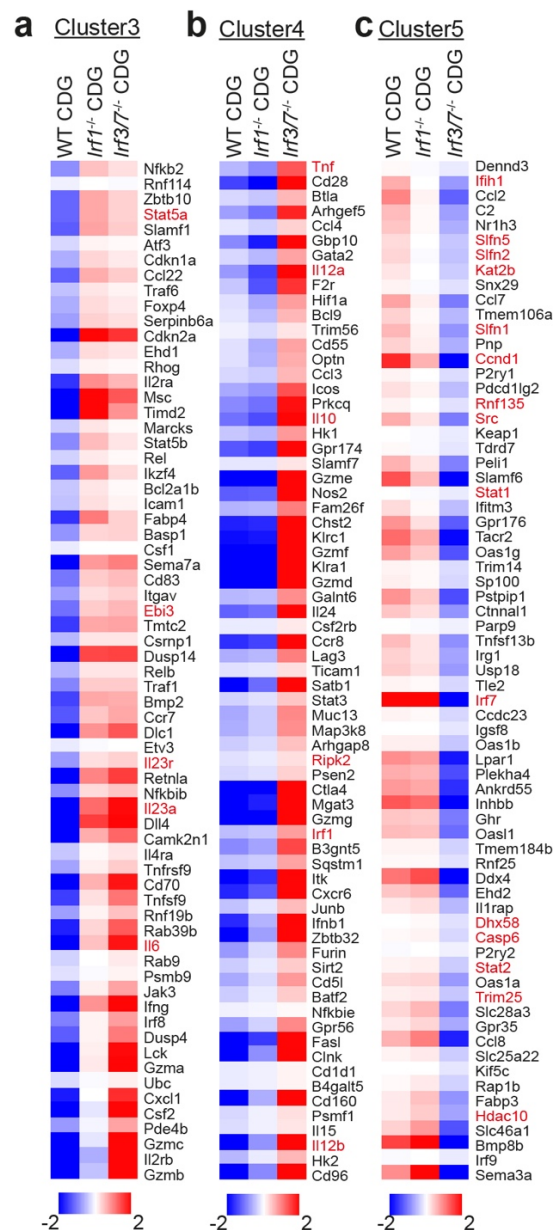

**Supplementary Figure 4. IL-1 $\beta$  re-establishes IFN $\gamma$  but not IL-17A expression in *Tmem173*<sup>-/-</sup> mice.**

*Il17a*, and *Ifn $\gamma$*  expression in CD4<sup>+</sup> T cells from *Tmem173*<sup>-/-</sup> versus wild-type mice. Wild-type and *Tmem173*<sup>-/-</sup> mice were immunized with OVA plus c-di-GMP *i.p.* and injected with recombinant mouse IL-1 $\beta$  on day 1 and day 3 before being sacrificed on day 5. n=4. \*\*\*  $p < 0.001$ . *P*-values, \*\*\* Two-way ANOVA with a Tukey's multiple comparisons test.

**Supplementary Figure 4.**

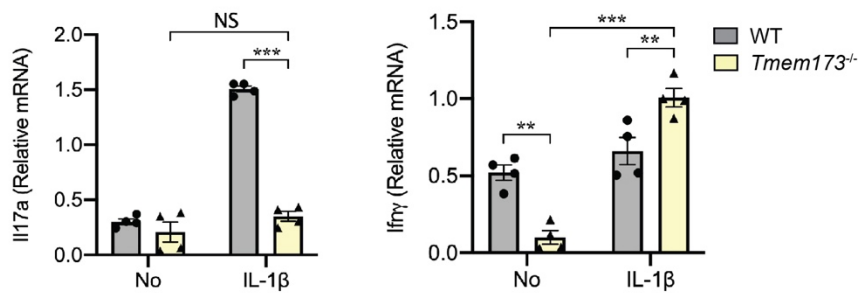

**Supplementary Figure 5. All blot images of Figure 2 and Figure 5.**

Supplementary Figure 5. All blot images of Figure 2 and Figure 5.

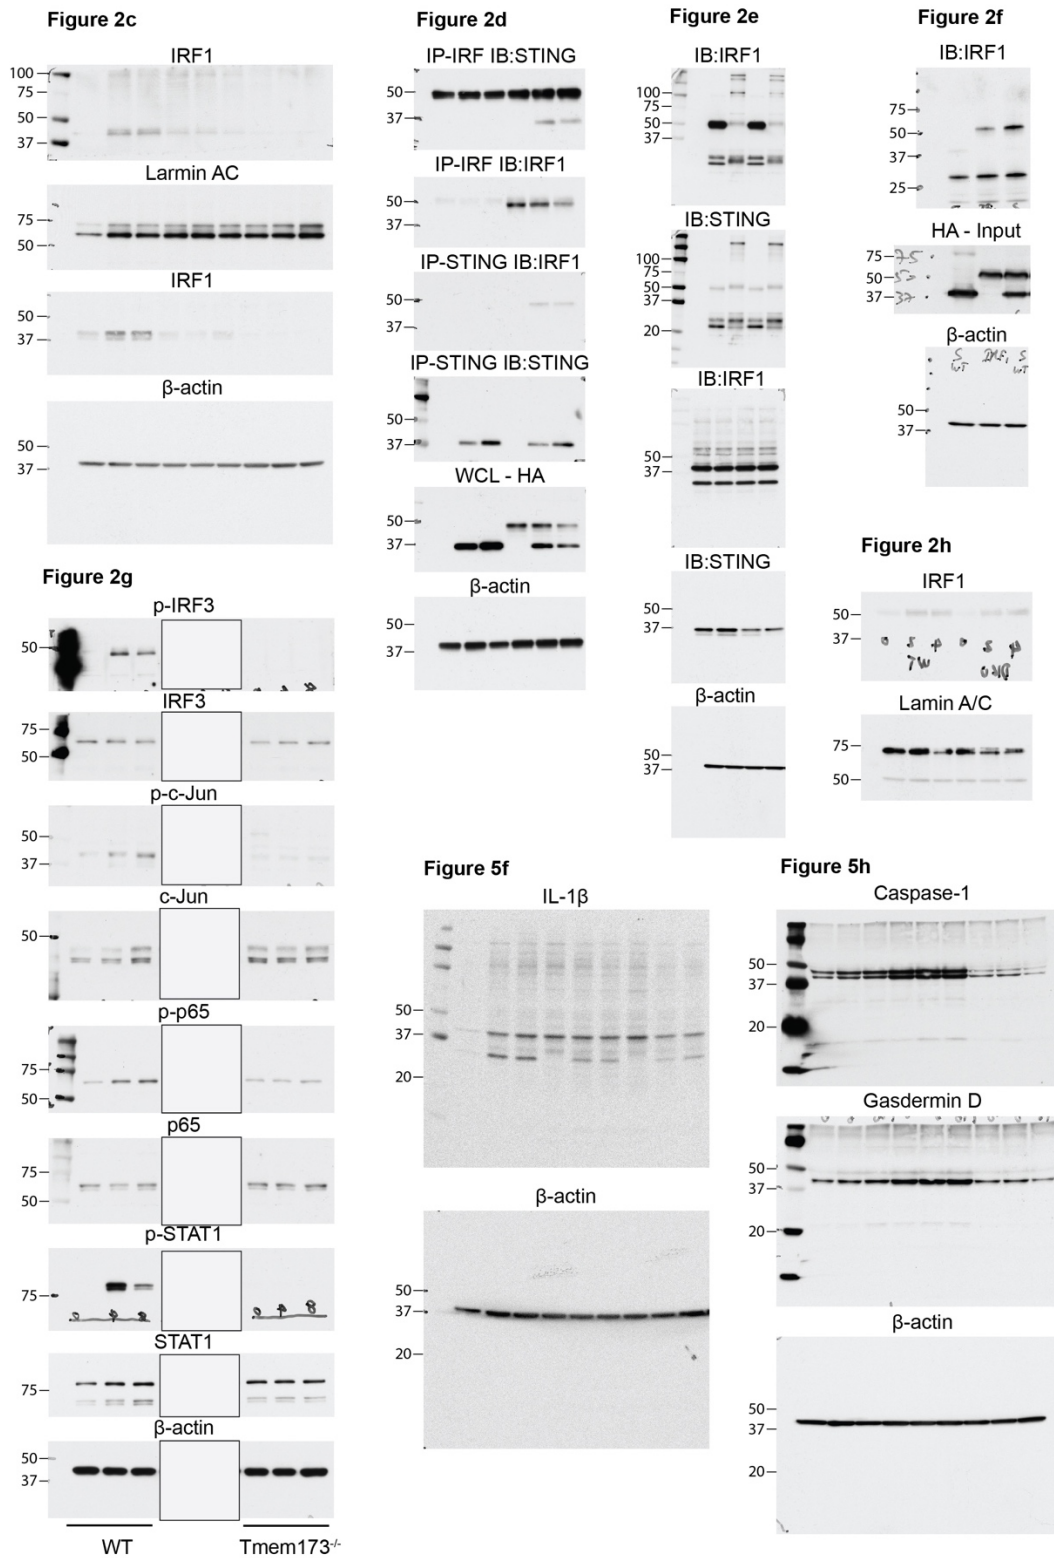

**Supplementary Table 1. Primers sequences used in this study.**

| <b>Genes</b>  | <b>Forward 5' to 3'</b>   | <b>Reverse 5' to 3'</b> |
|---------------|---------------------------|-------------------------|
| 18S           | GTAACCCGTTGAACCCATT       | CCATCCAATCGGTAGTAGCG    |
| Gapdh         | TGACCTCAACTACATGGTCTACA   | CTTCCCATTCTCGGCCTTG     |
| Casp1         | TACACGTCTTGCCCTCATTATC    | CTCCAGCAGCAACTTCATTTT   |
| Gbp10         | CCGTAAGTGGGAAGTCCTATTTG   | CAGATGCCCTTGGTTTGAGA    |
| Gbp6          | GTCTGGACTGTTCCGGATT       | GCTTGCATTCTGGTTTGTC     |
| Gsdmd         | CTCCTGTCAGATGGGATTGATG    | CCATTTCCAAGCTCTCCAGTT   |
| Ifna2         | CTTTCCTCGTGATGCTGATAGT    | CCTTCAAGGCCCTCTTGTT     |
| Il1 $\alpha$  | GAAGAAGAGACGGCTGAGTTT     | TCACTCTGGTAGGTGTAAGGT   |
| Il1 $\beta$   | GCAACTGTTCCCTGAACTCAACT   | ATCTTTTGGGGTCCGTCAACT   |
| IL2           | AGCAGCTGTTGATGGACCTA      | CGCAGAGGTCCAAGTTCAT     |
| IL4           | GGTCTCAACCCCAAGCTAGT      | GCCGATGATCTCTCTCAAGTGAT |
| Il6           | TAGTCCTTCCCTACCCCAATTTCC  | TTGGTCCTTAGCCACTCCTTC   |
| Il12a         | AGACATCACACGGGACCAAC      | CCAGGCAACTCTCGTTCTTGT   |
| Il12b         | TGGTTTGCCATCGTTTTGCTG     | ACAGGTGAGGTTCACTGTTTCT  |
| Il12rb1       | CTACAGGGTTTCCAAGACAGAC    | GTATGGTTCGGAGGGACAAAG   |
| Il12rb2       | AGAGAATGCTCATTGGCACTTC    | AACTGGGATAATGTGAACAGCC  |
| Il17a         | TGAGCTTCCCAGATCACAGA      | TCCAGAAGGCCCTCAGACTA    |
| Il17f         | TGCTACTGTTGATGTTGGGAC     | AATGCCCTGGTTTTGGTTGAA   |
| Il18          | ACCTTCCAAATCACTTCTCTT     | GTCTGATTCCAGGTCTCCATTT  |
| Il21          | CGCCTCCTGATTAGACTTCG      | CAGGGTTTGATGGCTTGAGT    |
| Il22          | ATGAGTTTTTCCCTTATGGGGAC   | GCTGGAAGTTGGACACCTCAA   |
| Il23a         | CAGCAGCTCTCTCGGAATCTC     | TGGATACGGGGCACATTATTTTT |
| Il23r         | TCAGTGCTACAATCTTCAGAGGACA | GCCAAGAAGACCATTCCCGA    |
| Il27          | AGCCTGTTGCTGCTACCCTTGC    | GTGGACATAGCCCTGAACCTCA  |
| Il33          | TCCAACCTCAAGATTTCCCCG     | CATGCAGTAGACATGGCAGAA   |
| Il36 $\alpha$ | GCAGCTCAGAAACAACATCAC     | AGGATCCACACACGACTACTA   |
| Ifn $\beta$ 1 | GGCAGATGTCTCAACTGCTC      | GACCACCATCCAGGCGTAG     |
| Ifn $\gamma$  | ACAGCAAGGCGAAAAAGGATG     | TGGTGGACCACTCGGATGA     |
| Irf1          | CAGAGGAAAGAGAGAAAGTCC     | CACACGGTGACAGTGCTGG     |
| Irf3          | GGCTTGTGATGGTCAAGGTT      | TGGGGCTCAGATATTTCCAG    |
| Irf7          | CACCCCATCTTCGACTTCA       | CCAAAACCCAGGTAGATGGTGTA |
| Mx2           | GAATTACCAGGGTGGCTGTAG     | CAGGTTGATGGTCTCCTGTTT   |
| Ptgs1         | GGATACTGGCTCTGGGAATTTG    | GTAGTCATGCGCTGAGTTGTAG  |

|        |                          |                           |
|--------|--------------------------|---------------------------|
| Ptgs2  | CGGACTGGATTCTATGGTGAAA   | CTTGAAGTGGGTCAGGATGTAG    |
| Ptges1 | CCACACTCCCTCTTAACCATAAA  | GCCAGAATTGTAGGTAGGTCTG    |
| RoRyt  | GCTCCATATTTGACTTTTCCCACT | GATGTTCCAACCTCCTCTTCTCTTG |
| Slfn5  | AAGGGAGGAAATGGATACCACA   | CTCAACCCTGACCACTCCG       |
| Tgfβ1  | CCACCTGCAAGACCATCGAC     | CTGGCGAGCCTTAGTTTGGAC     |
